# Supplementary material for: Ability of the LACE index to predict 30-day hospital readmissions in patients with community-acquired pneumonia
Source: PubMed Central journal article supplement — ERJ Open Res. 2020 Jul 20;6(2):00301-2019. doi: 10.1183/23120541.00301-2019 (PMC7369430; doi:10.1183/23120541.00301-2019), 2020-07-20
Supplement: 00301-2019.supplement.pdf [file 00301-2019.supplement.pdf]

## Ability of the LACE index to predict 30-day hospital readmissions in patients with community-acquired pneumonia

Claudia C. Dobler, Maryam Hakim, Sidhartha Singh, Matthew Jennings, Grant Waterer, Frances L. Garden

### Supplementary Material

Table S1: ICD-10 codes for community-acquired pneumonia (CAP) index admissions

| ICD code | Diagnosis                                                    | Number of hospitalisations, proportion of all CAP cases in %<br>(N=4508) | N, % of 30-day hospital readmissions (all-cause)<br>(N=636) | N, % of 30-day hospital readmissions (CAP only, any CAP ICD code)<br>(N=113) |
|----------|--------------------------------------------------------------|--------------------------------------------------------------------------|-------------------------------------------------------------|------------------------------------------------------------------------------|
| A40.3    | Sepsis due to Streptococcus pneumoniae                       | 22 (0.5%)                                                                | 4 (0.6%)                                                    | 3 (2.7%)                                                                     |
| B01.2    | Varicella pneumonia                                          | 2 (0.04%)                                                                |                                                             |                                                                              |
| J10.0    | Influenza with pneumonia, other influenza virus identified   | 10 (0.2%)                                                                | 3 (0.5%)                                                    |                                                                              |
| J11.0    | Influenza due to unidentified influenza virus with pneumonia | 0 (0%)                                                                   |                                                             |                                                                              |
| J12.0    | Adenoviral pneumonia                                         | 5 (0.1%)                                                                 |                                                             |                                                                              |
| J12.1    | Respiratory syncytial virus pneumonia                        | 16 (0.4%)                                                                | 2 (0.3%)                                                    |                                                                              |
| J12.2    | Parainfluenza virus pneumonia                                | 15 (0.3%)                                                                | 3 (0.5%)                                                    |                                                                              |
| J12.3    | Human metapneumovirus pneumonia                              | 35 (0.8%)                                                                | 4 (0.6%)                                                    |                                                                              |
| J12.8    | Other viral pneumonia                                        | 36 (0.8%)                                                                | 2 (0.3%)                                                    | 1 (0.9%)                                                                     |
| J12.9    | Viral pneumonia, unspecified                                 | 28 (0.6%)                                                                | 3 (0.5%)                                                    |                                                                              |
| J13      | Pneumonia due to Streptococcus pneumoniae                    | 141 (3.1%)                                                               | 11 (1.7%)                                                   | 2 (1.8%)                                                                     |
| J14      | Pneumonia due to Haemophilus influenzae                      | 44 (1.0%)                                                                | 4 (0.6%)                                                    | 1 (0.9%)                                                                     |
| J15.0    | Pneumonia due to Klebsiella pneumoniae                       | 17 (0.4%)                                                                | 6 (0.9%)                                                    | 2 (1.8%)                                                                     |
| J15.2    | Pneumonia due to staphylococcus                              | 27 (0.6%)                                                                | 3 (0.5%)                                                    | 1 (0.9%)                                                                     |
| J15.4    | Pneumonia due to other streptococci                          | 7 (0.2%)                                                                 |                                                             |                                                                              |
| J15.5    | Pneumonia due to Escherichia coli                            | 0 (0%)                                                                   |                                                             |                                                                              |
| J15.6    | Pneumonia due to other aerobic Gram-negative bacteria        | 6 (0.1%)                                                                 | 1 (0.2%)                                                    |                                                                              |
| J15.7    | Pneumonia due to Mycoplasma pneumoniae                       | 40 (0.9%)                                                                | 6 (0.9%)                                                    | 4 (3.5%)                                                                     |
| J15.8    | Other bacterial pneumonia                                    | 4 (0.1%)                                                                 | 2 (0.3%)                                                    |                                                                              |
| J15.9    | Bacterial pneumonia, unspecified                             | 19 (0.4%)                                                                | 3 (0.5%)                                                    | 2 (1.8%)                                                                     |
| J16.8    | Pneumonia due to other specified infectious organisms        | 11 (0.2%)                                                                | 1 (0.2%)                                                    | 1 (0.9%)                                                                     |
| J18.0    | Bronchopneumonia, unspecified                                | 70 (1.6%)                                                                | 7 (1.1%)                                                    | 1 (0.9%)                                                                     |
| J18.1    | Lobar pneumonia, unspecified                                 | 22 (0.5%)                                                                | 2 (0.3%)                                                    |                                                                              |
| J18.8    | Other pneumonia, organism unspecified                        | 54 (1.2%)                                                                | 8                                                           | 1                                                                            |
| J18.9    | Pneumonia, unspecified                                       | 3861 (85.6%)                                                             | 561                                                         | 93                                                                           |
| J85.1    | Abscess of lung with pneumonia                               | 16 (0.4%)                                                                |                                                             |                                                                              |

**Table S2: Most common ICD-10 codes for community-acquired pneumonia (CAP) index admissions, their frequency and C-statistic for 30-day all-cause readmissions and readmissions due to CAP**

| <b>ICD-10 code</b> | <b>Diagnosis</b>                          | <b>Number of hospitalisations, proportion of all CAP cases in %<br/><br/>(N=4508)</b> | <b>N, % of 30-day all-cause hospital readmissions<br/><br/>(N=636)</b> | <b>N, % of 30-day hospital readmissions due to CAP<br/><br/>(N=113)</b> | <b>C-statistic for 30-day all-cause readmissions (if only patients with this code (for the index admission) are included)</b> | <b>C-statistic for 30-day readmissions due to CAP (if only patients with this code (for the index admission) are included)</b> |
|--------------------|-------------------------------------------|---------------------------------------------------------------------------------------|------------------------------------------------------------------------|-------------------------------------------------------------------------|-------------------------------------------------------------------------------------------------------------------------------|--------------------------------------------------------------------------------------------------------------------------------|
| <b>All code s</b>  | <b>All ICD-10 codes for CAP</b>           |                                                                                       |                                                                        |                                                                         |                                                                                                                               |                                                                                                                                |
| J18.9              | Pneumonia, unspecified                    | 3861 (85.6%)                                                                          | 561                                                                    | 93                                                                      | 0.6407                                                                                                                        | 0.5715                                                                                                                         |
| J13                | Pneumonia due to Streptococcus pneumoniae | 141 (3.1%)                                                                            | 11 (1.7%)                                                              | 2 (1.8%)                                                                | 0.6420                                                                                                                        | 0.5755                                                                                                                         |
| J18.0              | Bronchopneumonia, unspecified             | 70 (1.6%)                                                                             | 7 (1.1%)                                                               | 1 (0.9%)                                                                | 0.6825                                                                                                                        | Cannot be calculated (no cases)                                                                                                |
